# Supplementary material for: The Air Quality Health Index and Asthma Morbidity: A Population-Based Study
Source: PubMed Central journal article supplement (PMC3546347; doi:10.1289/ehp.1104816), 2012-10-10
Supplement: ehp.1104816.s001.pdf [file ehp.1104816.s001.pdf]

## **Supplemental Material**

### **The Air Quality Health Index and Asthma Morbidity: A Population-Based Study**

Teresa To, Shixin Shen, Eshetu G. Atenafu, Jun Guan, Susan McLimont, Brian Stocks,  
Christopher Licskai

Supplemental Material Table S1. Mean air pollutant measures by year, season and regions in Ontario

| Covariates                                  | NO <sub>2</sub> (ppb) | O <sub>3</sub> (ppb) | PM <sub>2.5</sub> (µg/m <sup>3</sup> ) |
|---------------------------------------------|-----------------------|----------------------|----------------------------------------|
| <b>Year</b>                                 |                       |                      |                                        |
| 2003                                        | 28.55 ± 13.51         | 40.03 ± 15.21        | 14.62 ± 9.78                           |
| 2004                                        | 26.72 ± 12.16         | 37.12 ± 12.74        | 13.61 ± 9.74                           |
| 2005                                        | 27.07 ± 13.49         | 40.93 ± 16.18        | 14.48 ± 11.19                          |
| 2006                                        | 22.12 ± 11.87         | 38.20 ± 14.28        | 12.43 ± 8.50                           |
| 2003 to 2006                                | 26.05 ± 12.99         | 39.07 ± 14.73        | 13.78 ± 9.88                           |
| <b>Correlation Coefficients<sup>a</sup></b> |                       |                      |                                        |
| NO <sub>2</sub> and O <sub>3</sub>          | -0.1146 (p=0.0004)    |                      |                                        |
| NO <sub>2</sub> and PM <sub>2.5</sub>       | 0.0969 (p=0.0026)     |                      |                                        |
| O <sub>3</sub> and PM <sub>2.5</sub>        | 0.6500 (p<0.0001)     |                      |                                        |
| <b>Season<sup>b</sup></b>                   |                       |                      |                                        |
| Spring (Mar-May)                            | 28.97 ± 10.86         | 44.33 ± 9.86         | 12.49 ± 8.23                           |
| Summer (Jun-Aug)                            | 21.71 ± 10.86         | 49.61 ± 16.26        | 18.55 ± 12.06                          |
| Fall (Sep-Nov)                              | 23.69 ± 10.86         | 32.32 ± 13.24        | 13.21 ± 9.83                           |
| Winter (Dec-Feb)                            | 29.88 ± 13.23         | 29.76 ± 7.68         | 10.86 ± 6.87                           |
| <b>Region<sup>b</sup></b>                   |                       |                      |                                        |
| North                                       | 23.34 ± 13.60         | 38.29 ± 11.90        | 11.16 ± 8.13                           |
| South                                       | 24.37 ± 11.59         | 39.65 ± 14.98        | 14.85 ± 10.26                          |
| Central                                     | 30.64 ± 13.24         | 39.50 ± 15.84        | 14.94 ± 10.66                          |
| East                                        | 23.42 ± 12.56         | 38.17 ± 14.72        | 13.65 ± 9.81                           |
| West                                        | 25.58 ± 10.83         | 40.13 ± 15.87        | 14.49 ± 9.60                           |

<sup>a</sup> Correlation coefficients were based on Pearson Correlation analysis; p stands for p-value.

<sup>b</sup> Data stratified by season and region are based on data averaged from 2003-2006.
